# Supplementary material for: The Geomagnetic Field (GMF) Is Required for Lima Bean Photosynthesis and Reactive Oxygen Species Production
Source: MDPI journal article supplement (doi:10.3390/ijms24032896), 2023-02-02
Supplement: s1 [file s1]

## Supplementary Table S1. Primers used in this study

| Gene            | Locus             | Sequence 5' → 3'       | Sense   |
|-----------------|-------------------|------------------------|---------|
| <i>PlIScA1</i>  | PI01G0000340900.1 | AGTTGGTTGAGGATAAGGGTGT | Forward |
| <i>PlIScA1</i>  | PI01G0000340900.1 | CACCACAACCACACTGACCTT  | Reverse |
| <i>PlIScA2</i>  | PI03G0000156300.1 | TCACGATTCCGACACAACCA   | Forward |
| <i>PlIScA2</i>  | PI03G0000156300.1 | TTTTCGAACGCAGTTGTGGG   | Reverse |
| <i>PlcpIScA</i> | PI02G0000398800.1 | ACGGATAACGCACTGAAGCA   | Forward |
| <i>PlcpIScA</i> | PI02G0000398800.1 | GACATACCAGAGCACCCACC   | Reverse |
| <i>PlUBP6</i>   | PI10G0000334000.1 | TGGCTGGGTCAAGCAAGAAA   | Forward |
| <i>PlUBP6</i>   | PI10G0000334000.1 | ACGCCATATGCCAATCACCT   | Reverse |
| <i>SOD</i>      | DQ159910          | AAGCACCACAGGGCTTATGT   | Forward |
| <i>SOD</i>      | DQ159910          | ATGGTTTTCCACCTCCACCT   | Reverse |
| <i>CAT</i>      | DQ004737          | GCCGCATGGTCTTGAATAAG   | Forward |
| <i>CAT</i>      | DQ004737          | ATTTGGGTGCATTAGCAGGA   | Reverse |
| <i>APX</i>      | DQ004738          | AGGAGCGTTCTGGATTTGAG   | Forward |
| <i>APX</i>      | DQ004738          | AATCAGCGAAGAACGCATCT   | Reverse |
| <i>PRX</i>      | DQ159909          | GACCCTGTCATGGACCAAAC   | Forward |
| <i>PRX</i>      | DQ159909          | CAATGCCCTTGGTCCTCTTA   | Reverse |
| <i>GR</i>       | DQ159906          | GCCCCTTCATTCCTGATATTC  | Forward |
| <i>GR</i>       | DQ159906          | TCGTCAAATCCCCTCAGAAC   | Reverse |
| <i>GPX</i>      | DQ004739          | AACAGGAAACTCAGCCTTGAA  | Forward |
| <i>GPX</i>      | DQ004739          | ATTGTCAACGTTGCCTCACA   | Reverse |
| <i>PlActin1</i> | DQ159907          | AGGCTCCTCTTAACCCCAAG   | Forward |
| <i>PlActin1</i> | DQ159907          | GTGGGAGAGCATAACCCTCA   | Reverse |
