# Supplementary material for: The Geomagnetic Field (GMF) Is Required for Lima Bean Photosynthesis and Reactive Oxygen Species Production
Source: MDPI journal article supplement (doi:10.3390/ijms24032896), 2023-02-02
Supplement: s1 [file s1]

Supplementary Table S2. Chromatographic gradient used for the separation of Chlorophyll, chlorophyll degradation products, and carotenoids.

| Time (min) | Solvent A (%) | Solvent B (%) |
|------------|---------------|---------------|
| 0          | 95            | 5             |
| 5          | 60            | 40            |
| 10         | 50            | 50            |
| 12         | 48            | 52            |
| 14         | 45            | 55            |
| 16         | 40            | 60            |
| 18         | 40            | 60            |
| 20         | 20            | 80            |
| 22         | 20            | 80            |
| 24         | 5             | 95            |
| 27         | 5             | 95            |
| 27.01      | 95            | 5             |
| 30         | 95            | 5             |
| 0          | 95            | 5             |
