# Supplementary material for: The Geomagnetic Field (GMF) Is Required for Lima Bean Photosynthesis and Reactive Oxygen Species Production
Source: MDPI journal article supplement (doi:10.3390/ijms24032896), 2023-02-02
Supplement: s1 [file s1]

**Supplementary Figure S2. Non photochemical quenching.**

Dark adapted leaves were exposed to actinic light as reported in the figure (yellow bar) followed by dark recovery (gray bar). Asterisks indicate significant differences between GMF and NNMF values.

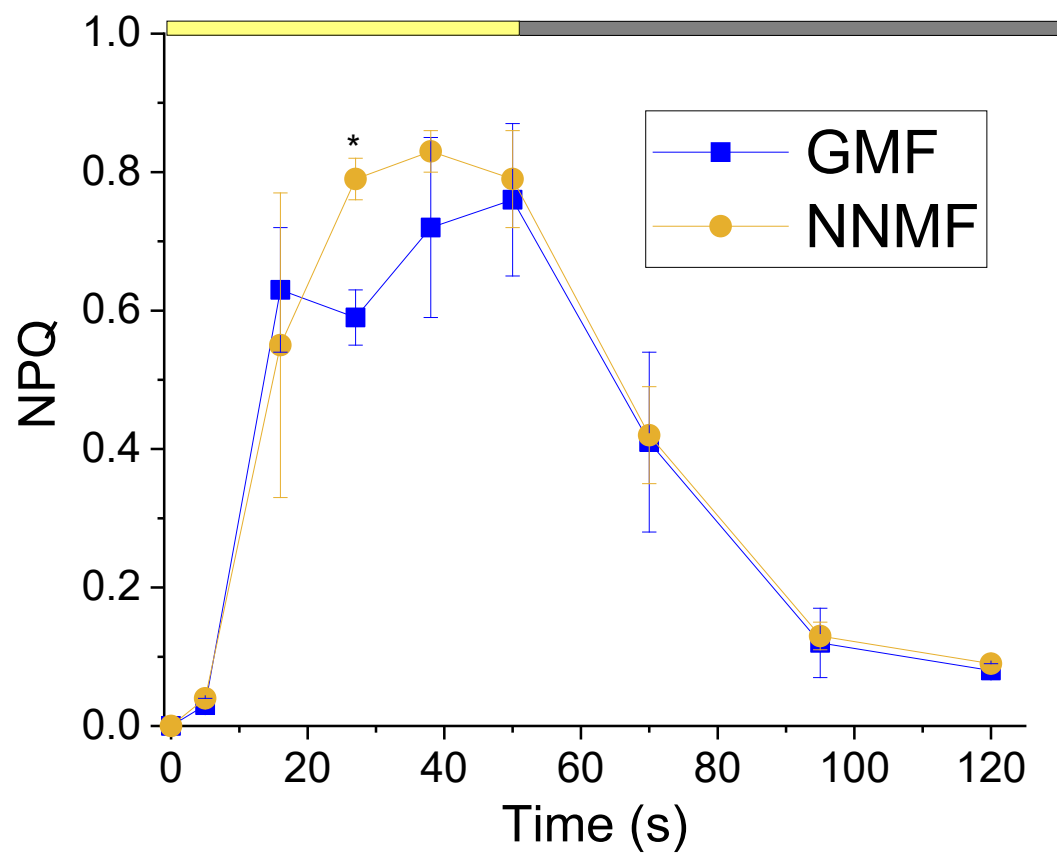

| Phase         | Duration | # of pulses | 1st pulse | Pulse interval |
|---------------|----------|-------------|-----------|----------------|
| Light         | 60 s     | 5           | 7 s       | 12 s           |
| Dark recovery | 88 s     | 3           | 11 s      | 26 s           |

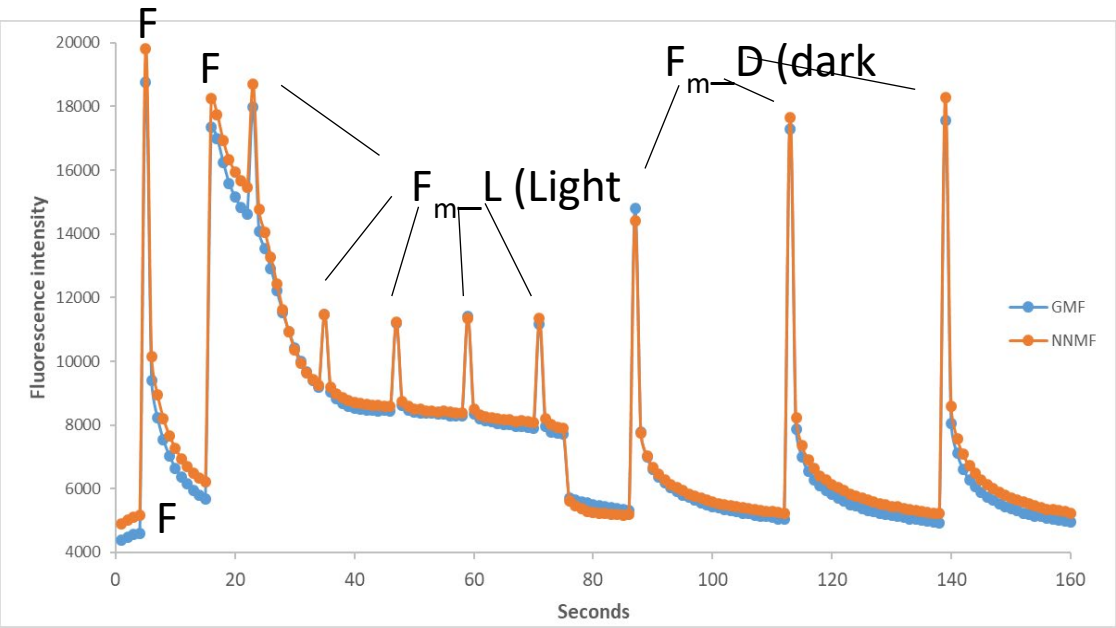

|               | GMF      |               | NNMF            |               | ANOVA         |              |
|---------------|----------|---------------|-----------------|---------------|---------------|--------------|
|               | Mean     | SD            | Mean            | SD            | F-ratio       | P value      |
| <b>Fp</b>     | 17534.17 | 333.91        | <b>18267.33</b> | <b>529.38</b> | <b>8.986</b>  | <b>0.010</b> |
| <b>Fm_L1</b>  | 18335.80 | 199.06        | <b>18981.29</b> | <b>419.47</b> | <b>10.008</b> | <b>0.010</b> |
| Fm_L2         | 12849.50 | 2300.97       | 12592.00        | 1760.34       | 0.041         | 0.845        |
| Fm_L3         | 11911.80 | 521.57        | 11931.20        | 995.95        | 0.010         | 0.970        |
| Fm_L4         | 11339.60 | 683.63        | 11053.40        | 378.99        | 0.670         | 0.437        |
| Fm_Lss        | 10929.80 | 627.51        | 10897.40        | 237.14        | 0.012         | 0.917        |
| NPQ_L1        | 0.03     | 0.01          | 0.04            | 0.01          | 3.173         | 0.095        |
| NPQ_L2        | 0.63     | 0.09          | 0.55            | 0.22          | 0.515         | 0.489        |
| <b>NPQ_L3</b> | 0.59     | <b>0.04</b>   | <b>0.79</b>     | <b>0.03</b>   | <b>70.620</b> | <b>0.000</b> |
| NPQ_L4        | 0.72     | 0.13          | 0.83            | 0.03          | 1.934         | 0.214        |
| NPQ_Lss       | 0.76     | 0.11          | 0.79            | 0.07          | 0.394         | 0.548        |
| Qp_L1         | 0.19     | 0.06          | 0.21            | 0.03          | 0.679         | 0.431        |
| Qp_L2         | 0.26     | 0.06          | 0.25            | 0.06          | 0.112         | 0.743        |
| Qp_L3         | 0.34     | 0.07          | 0.34            | 0.06          | 0.015         | 0.905        |
| Qp_L4         | 0.39     | 0.06          | 0.38            | 0.05          | 0.081         | 0.782        |
| Qp_Lss        | 0.53     | 0.09          | 0.53            | 0.06          | 0.394         | 0.548        |
| <b>Rfd</b>    | 1.16     | <b>0.10</b>   | <b>1.30</b>     | <b>0.06</b>   | <b>6.787</b>  | <b>0.031</b> |
| Fm_D1         | 13901.60 | 827.95        | 13957.67        | 664.11        | 0.016         | 0.903        |
| <b>Fm_D2</b>  | 17067.60 | <b>383.30</b> | <b>17458.13</b> | <b>294.02</b> | <b>4.327</b>  | <b>0.062</b> |
| <b>Fm_D3</b>  | 17575.20 | <b>170.02</b> | <b>18186.20</b> | <b>153.29</b> | <b>35.618</b> | <b>0.000</b> |
| NPQ_D1        | 0.41     | 0.13          | 0.42            | 0.07          | 0.065         | 0.805        |
| NPQ_D2        | 0.12     | 0.05          | 0.13            | 0.02          | 0.438         | 0.521        |
| NPQ_D3        | 0.08     | 0.01          | 0.09            | 0.01          | 1.697         | 0.217        |
| Qp_D1         | 0.85     | 0.04          | 0.87            | 0.05          | 0.587         | 0.461        |
| Qp_D2         | 0.93     | 0.02          | 0.93            | 0.03          | 0.205         | 0.659        |
| <b>Qp_D3</b>  | 0.94     | <b>0.02</b>   | <b>0.97</b>     | <b>0.01</b>   | <b>11.391</b> | <b>0.006</b> |
| QY_max        | 0.78     | 0.01          | 0.76            | 0.02          | 2.623         | 0.140        |
| QY_L1         | 0.18     | 0.04          | 0.15            | 0.02          | 1.642         | 0.232        |
| QY_L2         | 0.17     | 0.03          | 0.18            | 0.02          | 0.365         | 0.561        |
| QY_L3         | 0.22     | 0.05          | 0.21            | 0.04          | 0.322         | 0.583        |
| QY_L4         | 0.25     | 0.04          | 0.24            | 0.03          | 0.118         | 0.739        |
| QY_Lss        | 0.26     | 0.05          | 0.26            | 0.04          | 0.010         | 0.924        |
| QY_D1         | 0.62     | 0.03          | 0.62            | 0.02          | 0.141         | 0.716        |
| QY_D2         | 0.70     | 0.01          | 0.70            | 0.01          | 0.882         | 0.362        |
| QY_D3         | 0.72     | 0.00          | 0.72            | 0.00          | 0.021         | 0.887        |
