# Supplementary material for: The Geomagnetic Field (GMF) Is Required for Lima Bean Photosynthesis and Reactive Oxygen Species Production
Source: MDPI journal article supplement (doi:10.3390/ijms24032896), 2023-02-02
Supplement: s1 [file s1]

## Supplementary Figure S1. OJIP Chlorophyll Fluorescence Induction Kinetics

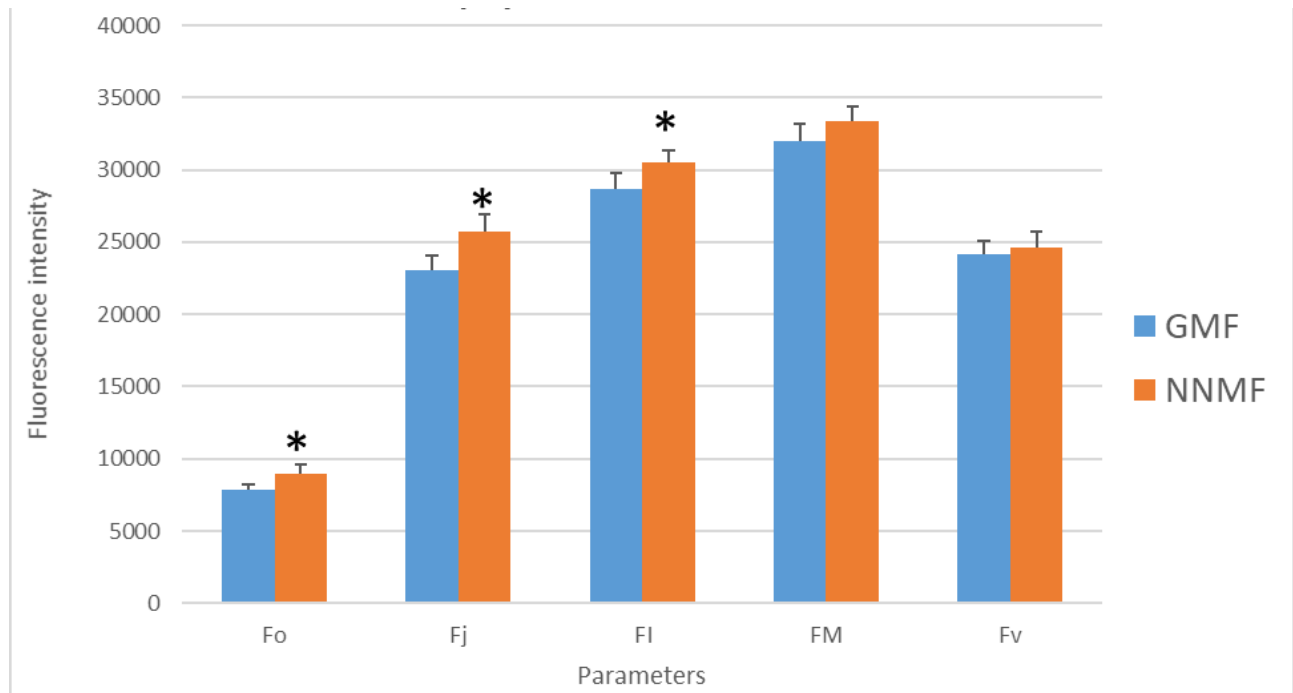

The initial fluorescence intensity ( $F_0$ ), fluorescence intensity at about 2 ms ( $F_j$ ) and at about 30 ms ( $F_I$ ) of dark-adapted leaves are significantly higher in NNMF. Whereas maximal fluorescence level ( $F_P = F_M$  under saturating excitation light) at 300 ms shows almost significant ( $P = 0.065$ ) higher values in NNMF. The variable chlorophyll fluorescence ( $F_M - F_0$ ) =  $F_v$  shows not significant differences between GMF and NNMF.
