# Supplementary material for: The Geomagnetic Field (GMF) Is Required for Lima Bean Photosynthesis and Reactive Oxygen Species Production
Source: MDPI journal article supplement (doi:10.3390/ijms24032896), 2023-02-02

# Supplementary Figure S4

Time-course variations of the magnetic field intensity B expressed as nT inside the triaxial Helmholtz coils system with current (i.e., NNMF) and without current (i.e., GMF) in the coils. Data are representative of 24 h. As it can be seen, no other sources of MF were present but the GMF.

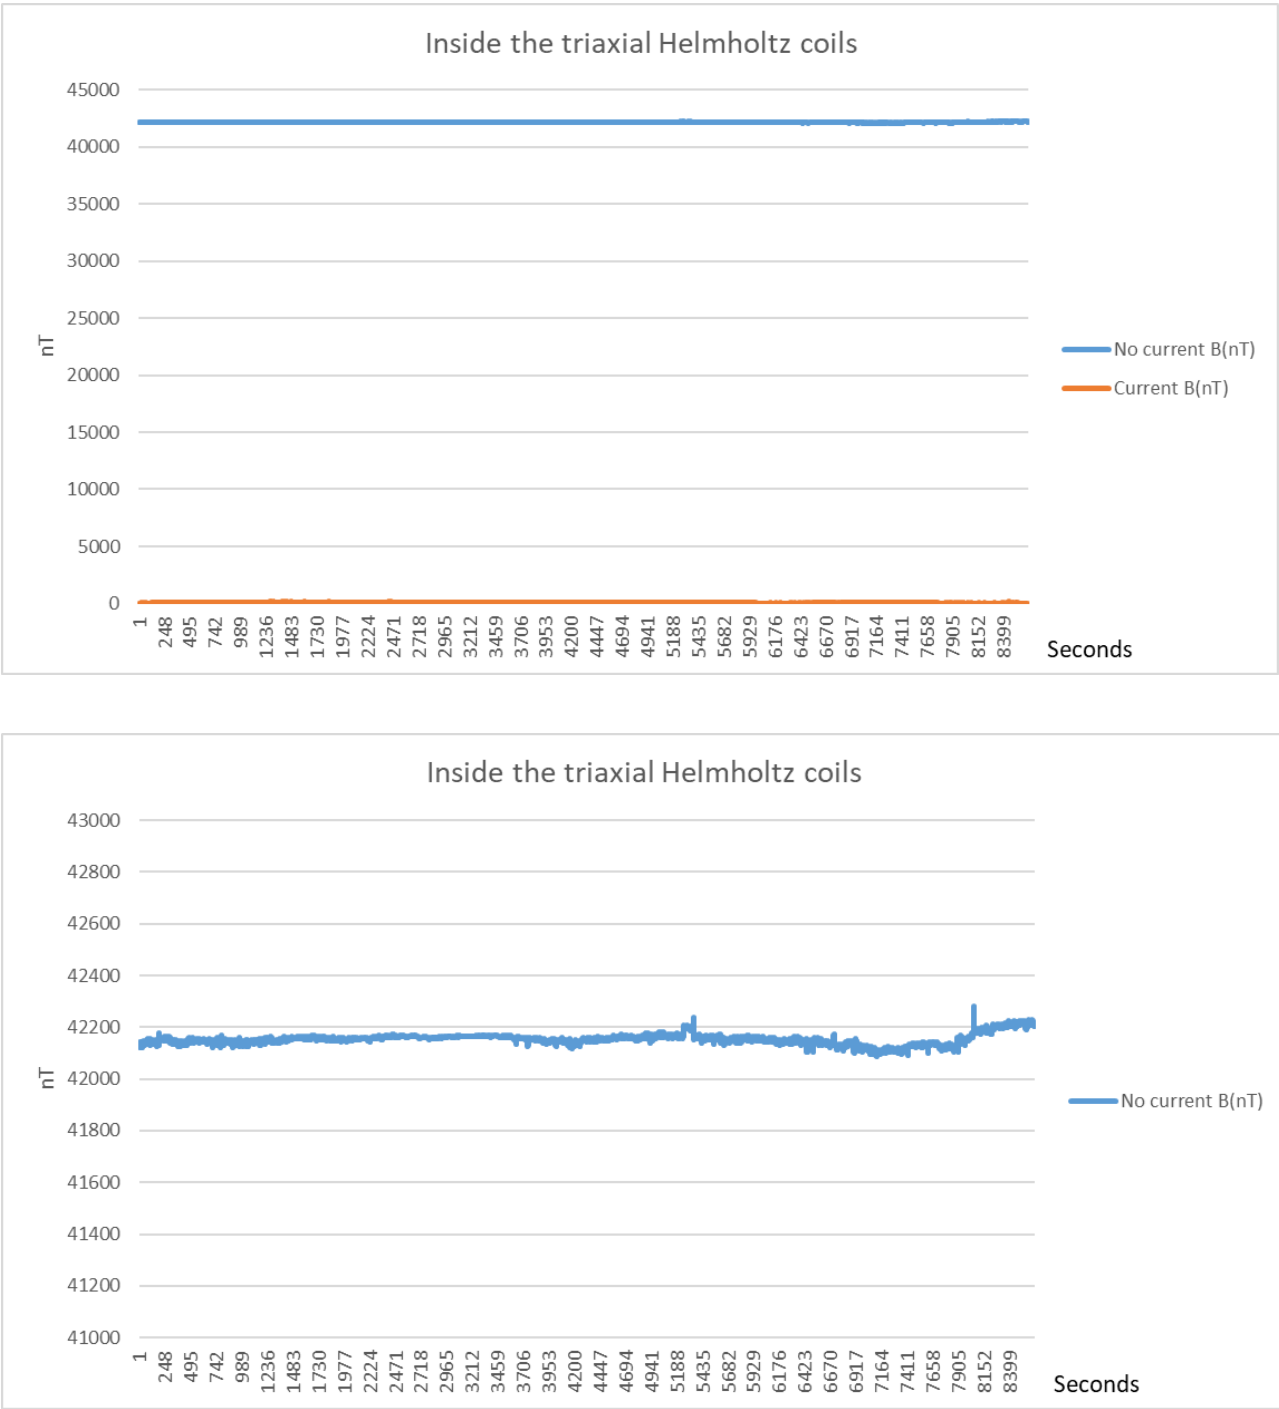

Inside the triaxial Helmholtz coils

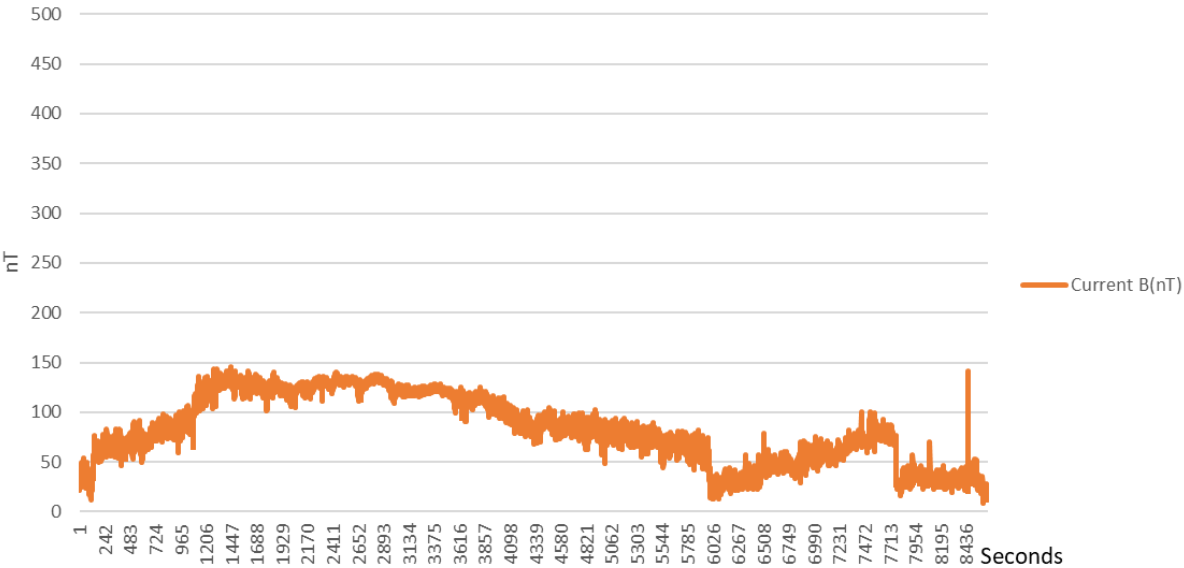

Supplement: s1 [file s1]
